# Supplementary material for: Electronic and structural study of Pt-modified Au vicinal surfaces: a model system for Pt–Au catalysts
Source: Royal Society of Chemistry journal article supplement (doi:10.1039/c4cp01448k), 2014-01-01
Supplement: c4cp01448k1.pdf [file c4cp01448k1.pdf]

**Electronic and structural study of Pt-modified Au vicinal surfaces: A model  
system for Pt-Au catalysts**

*Mauricio J. Prieto, Emilia A. Carbonio, Shadi Fatayer , Richard Landers and Abner de Siervo*

***Electronic Supplementary Material***

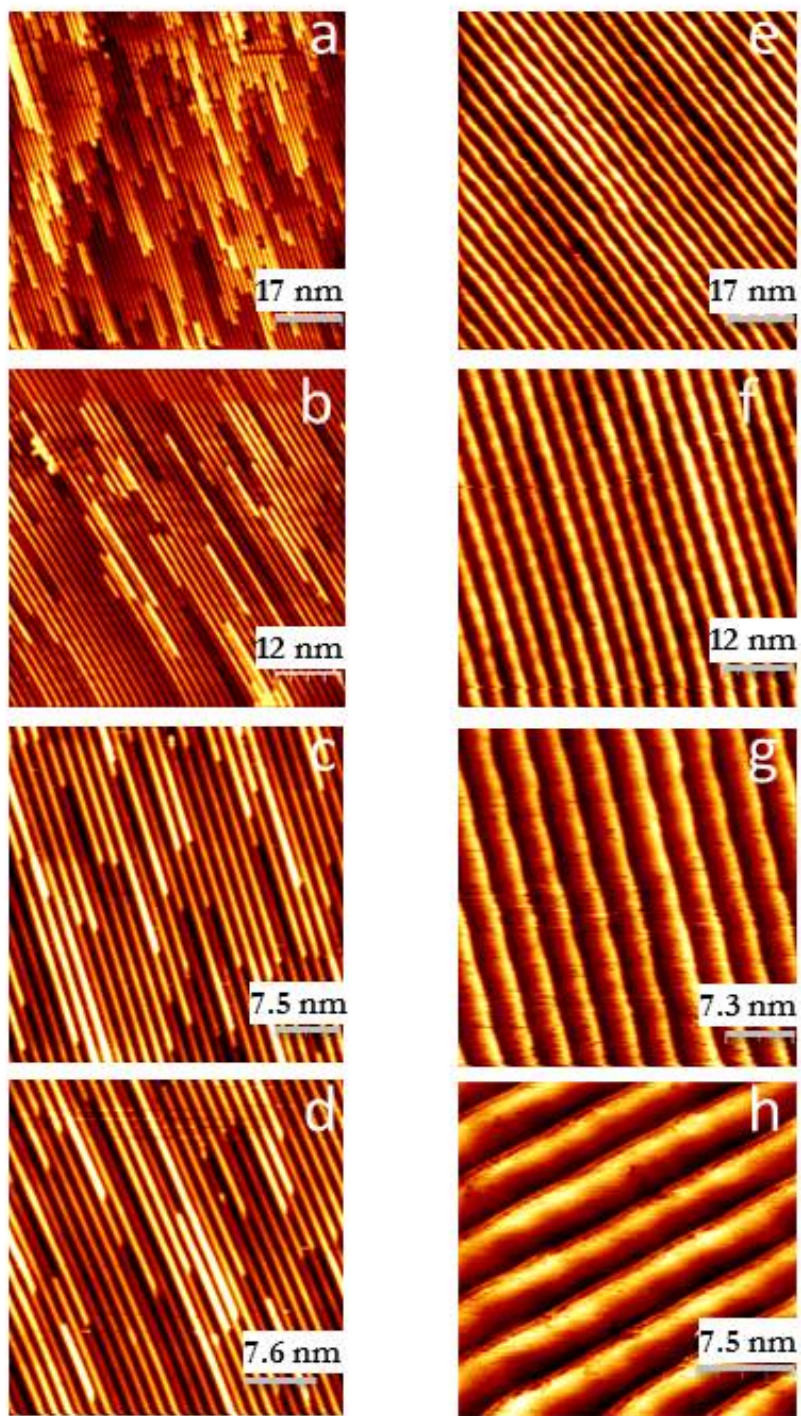

**Fig. S1.** STM images of clean Au(332) (a-d) and Au(887) (e-h) recorded under similar conditions ( $V_{bias}$  and  $I_t$ ) as in Figure 1.

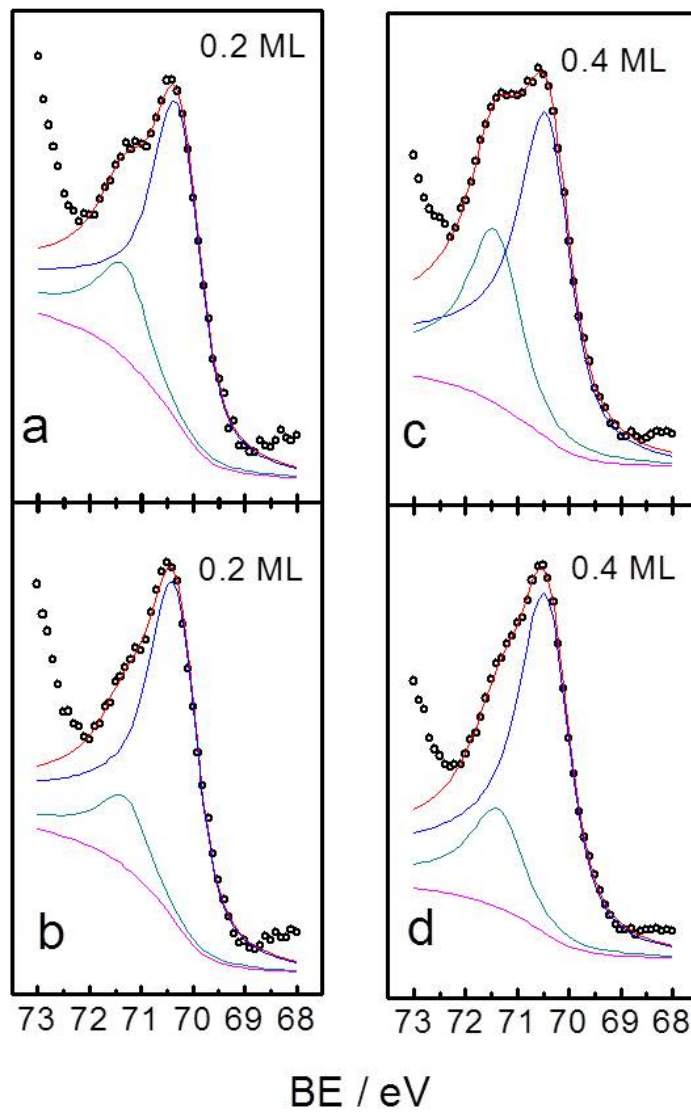

**Fig. S2.** Results from fitting of Pt  $4f_{7/2}$  core photoemission line Pt/Au(332) samples. (a,c) as prepared and (b,d) annealed samples. Pt coverage as indicated.

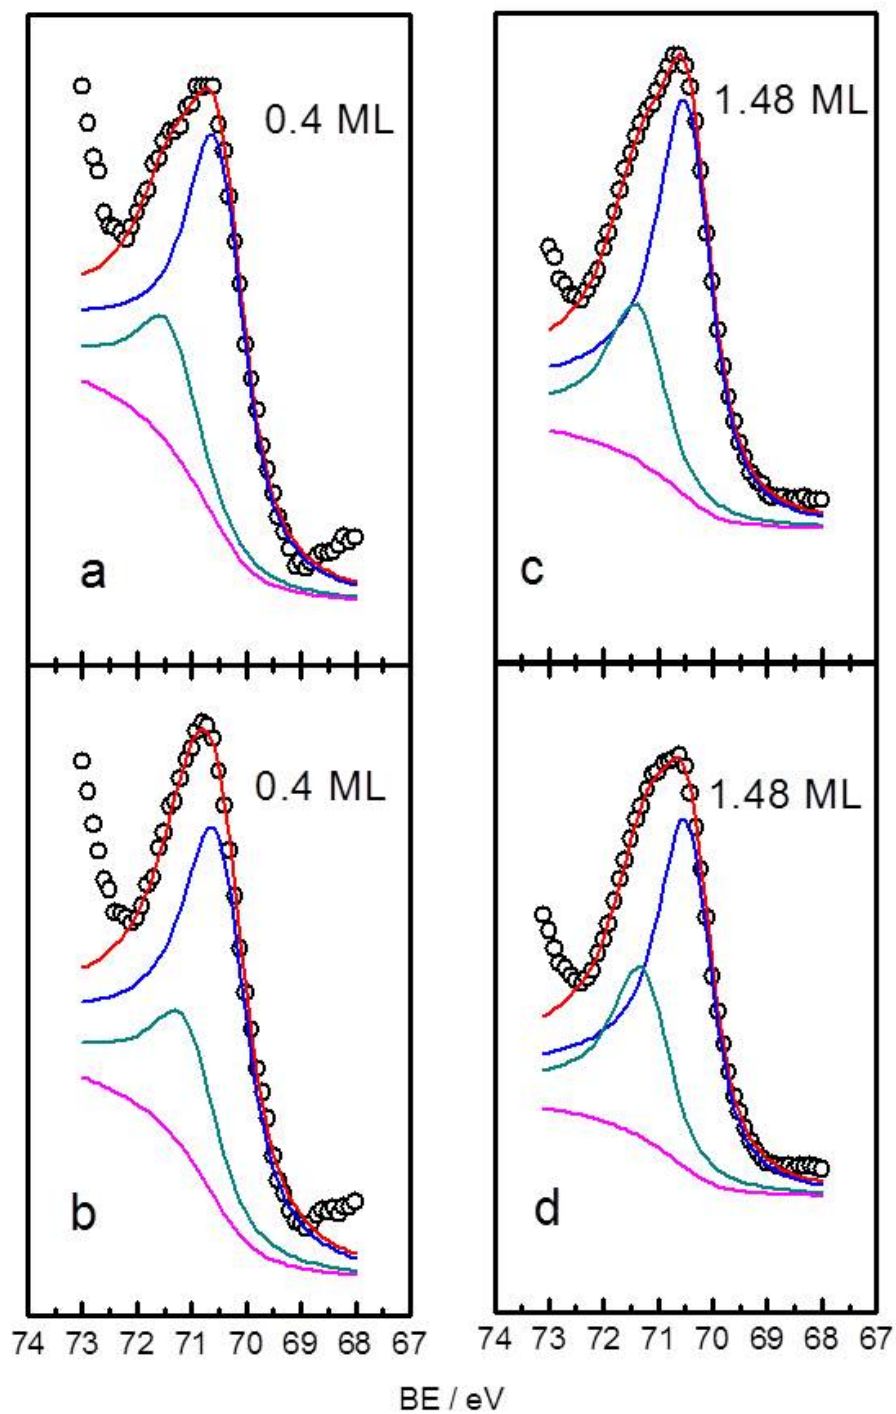

**Fig. S3.** Results from fitting of Pt  $4f_{7/2}$  core photoemission line for Pt/Au(788) samples. (a,c) as prepared and (b,d) annealed samples. Pt coverage as indicated.

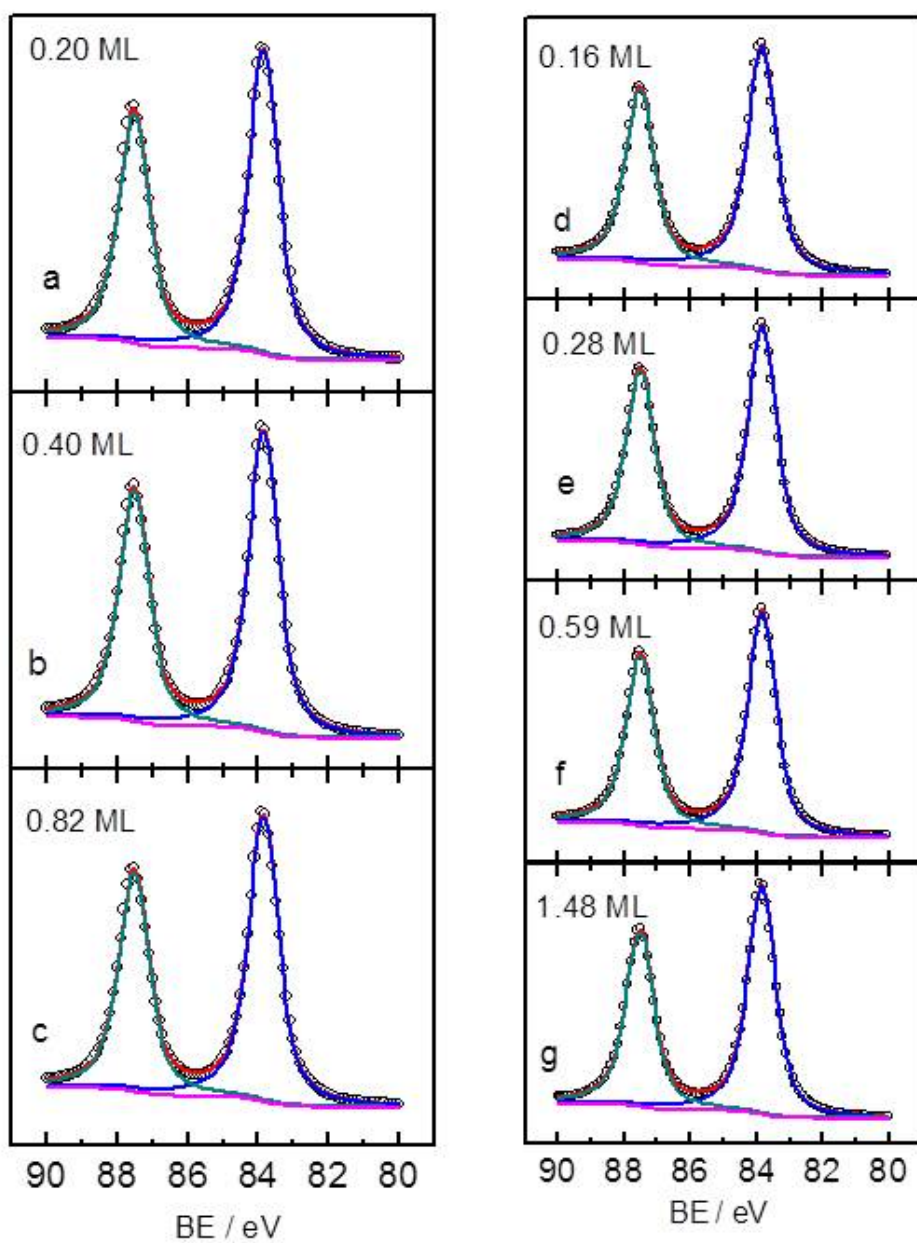

**Fig. S4.** Results from fitting of Au 4f core photoemission line for the as prepared samples. (a-c) Pt/Au(332) and (d-g) Pt/Au(788). Pt coverage as indicated.
